# Supplementary material for: Comparative assessment of RNA-dependent RNA polymerase (RdRp) inhibitors under clinical trials to control SARS-CoV2 using rigorous computational workflow
Source: PubMed Central journal article supplement (PMC9038185; doi:10.1039/d1ra04460e), 2021-09-02
Supplement: RA-011-D1RA04460E-s001.pdf [file RA-011-D1RA04460E-s001.pdf]

Supplementary material

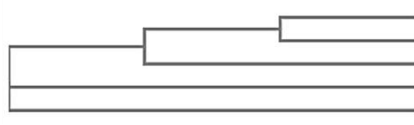

5K5M-Dengue-virus-2\_FLAVIVIRIDAE\_0.39442  
 400W-Hepatitis-C\_FLAVIVIRIDAE\_0.39768  
 7AAP-SARS-CoV2\_CORONAVIRIDAE\_0.40215  
 2CKW-SAPPORO-VIRUS\_NOROVIRUS\_0.38065  
 4R0E-Poliiovirus-1\_PICORNAVIRIDAE\_0.38148

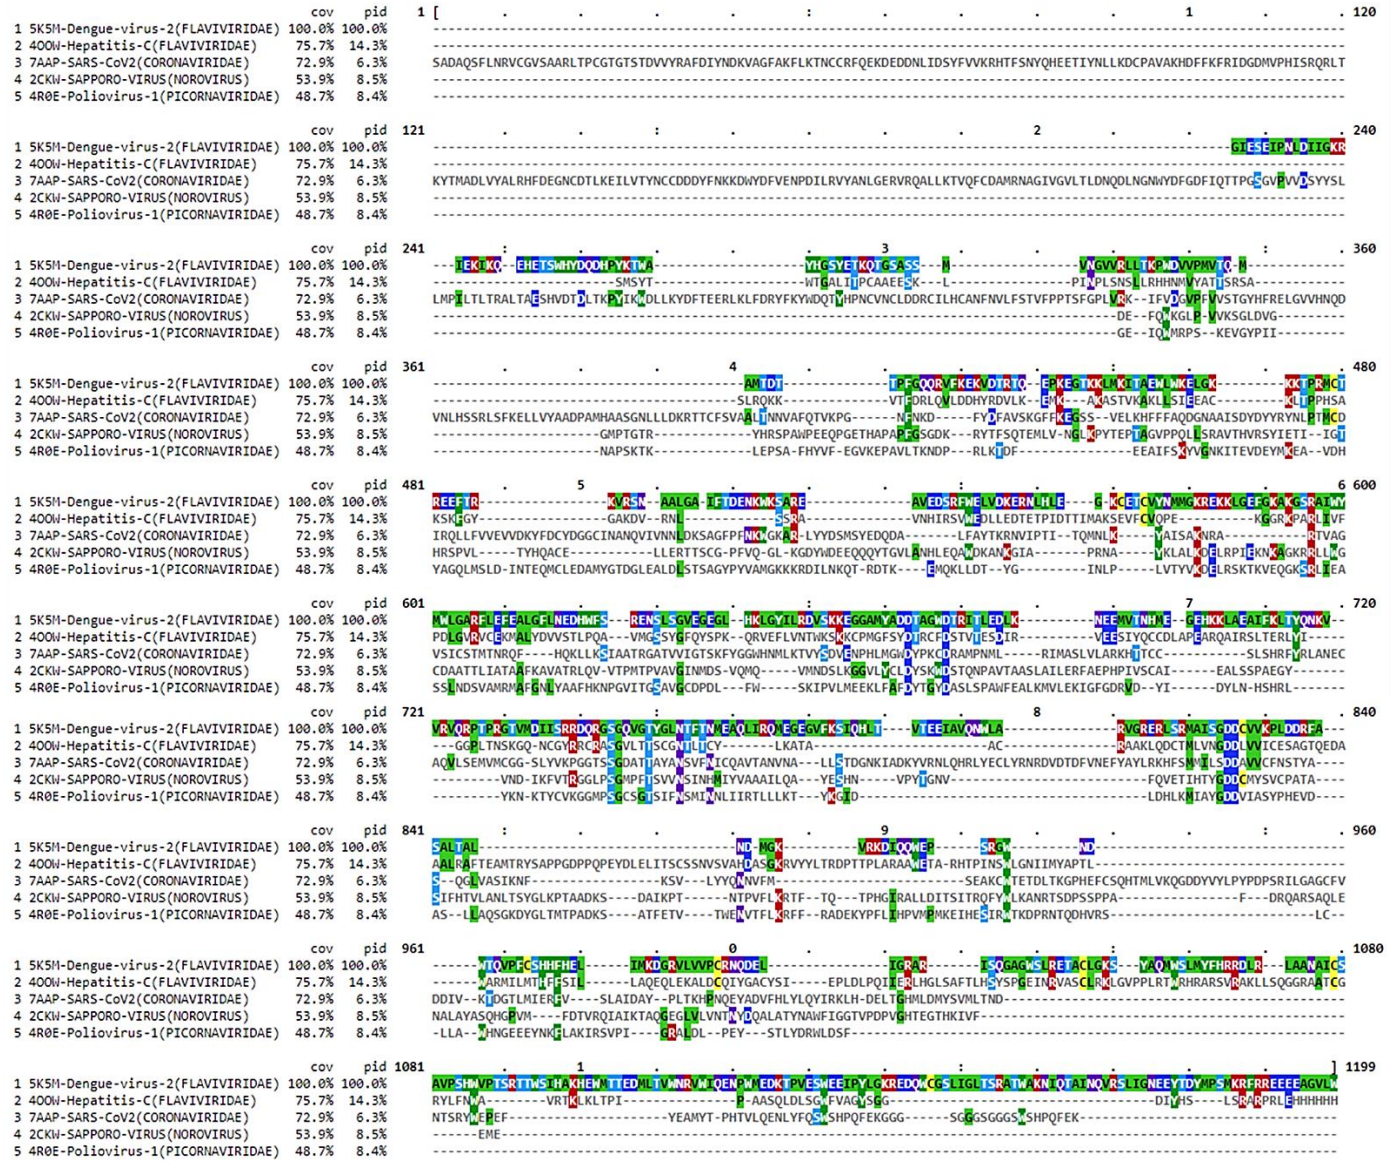

Fig. S1 Phylogenetic analysis and Multiple sequence alignment of RdRps from various +ssRNA viral family representative viruses.
